# Supplementary material
Source: publisher figshare collection journal article supplement (https://gsapubs.figshare.com/articles/dataset/_/13232366)

Figure S1. Atom probe tomography data of specimens 3 and 4.

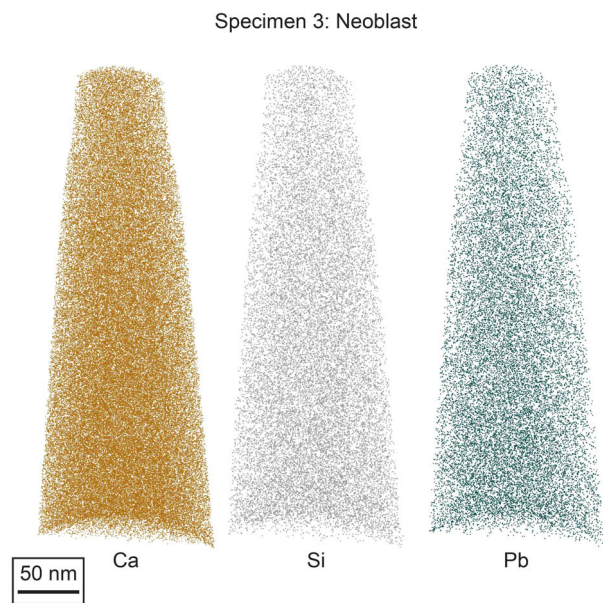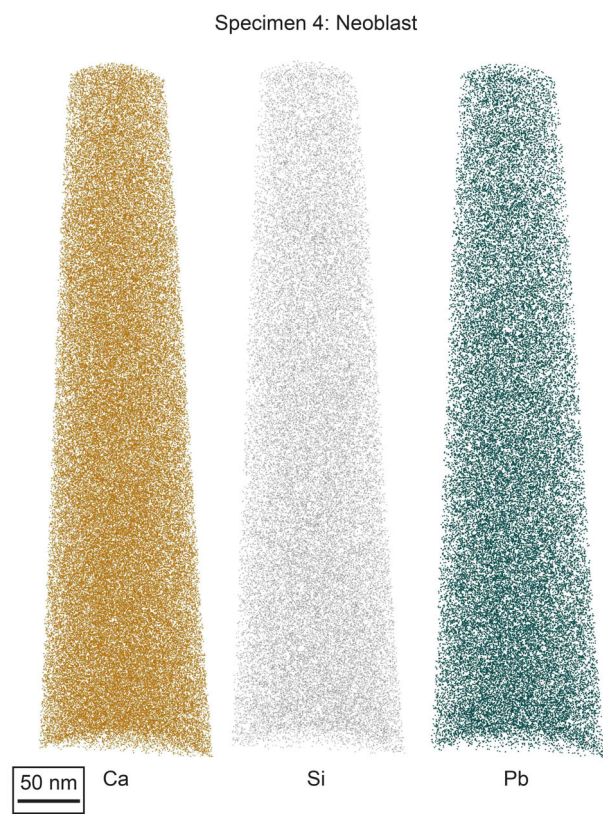

Supplement: Supplementary file 1 [file 1]

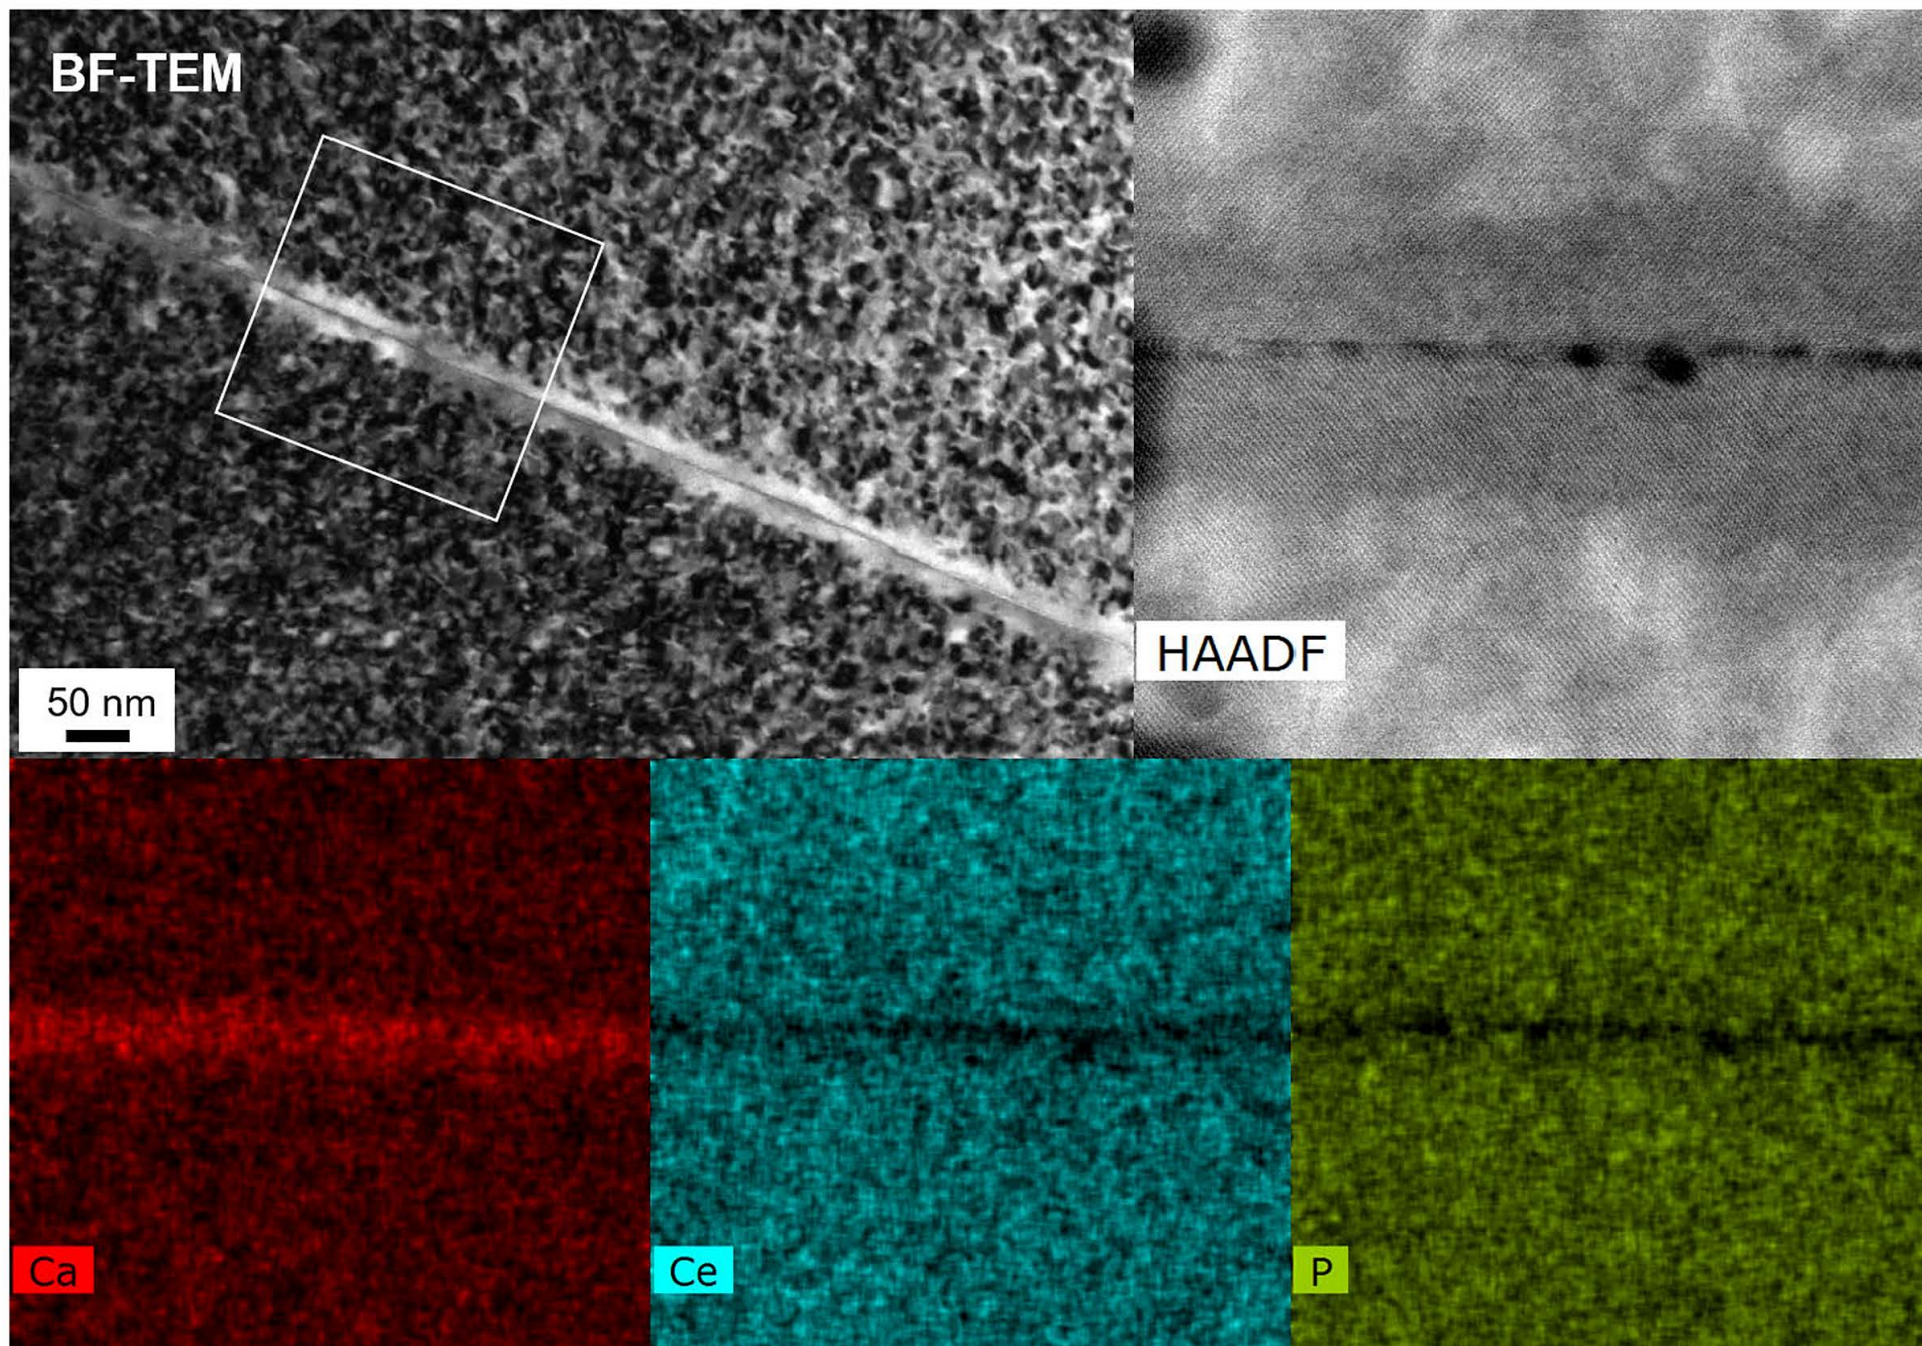

Figure S2. Bright field TEM image and EDS data

Supplement: Supplementary file 2 [file 1]
